# Supplementary material for: Integrated Bioinformatical Analysis for Identification the invasion-related Genes in ovarian cancer
Source: Research Square preprint supplement (doi:10.21203/rs.3.rs-4925442/v1), 2024-10-22
Supplement: Supplementary file 1 [file 562399bc52f228ff00aee8b6.docx]

[Supplementary material](https://editorial.nature.com/submission-file/a8d69835-8fb9-4ab1-97b1-264434a50471/3.1/64ed8dec-b38a-4bcf-be6c-9fc5339634c0" \t "https://editorial.nature.com/submissions/_blank)

**Table S1.** Compared with stages I and stages II-III-IV OC, the top 351 upregulated and the top 300 downregulated genes in OC based on TCGA database

| **DEGs** | **Genes** |
| --- | --- |
| Upregulated | CFB, AP1M2, DEFB1, IL4I1, HCG26, ETV7, CYBA, LRP8, IKBKE, C2, PARP12, HLA-F,IFIH1, C2orf88, CSAG3, DIF2B3, LAMP3, LGAL29, ISG15, DHCR24, HLA-DRB6, IDO1, HTR3A, COX8A, ALDH3B2, GPSM3, ADGRG1, COMTD1, EPHX4, CSF1, PHKG2, PARP10, LUZP6, AP3D1, GBP5, MYDGF, SNHG17, UQCC3, MTLN, IFI27, ARHGAP4, ANO9, CXCL10, OAS1, CABP4, DDX49, LCN2, APOBEC3G, RPL13AP17, CDCA3, EYA2, HOXD1, HOXD4, ILDR1, CORO2A, ACBD4, ADCK5, IRF1, ARHGEF5, IFI30, PRORSD1P, CCDC134, C6orf223, CP, TMEM187, MAGT1, IFI16, CYC1, LTB, CDCA5, AP5B1, OASL, IFIT3, BTC, EHF, SLX1A, IL6R, ALOX12P2, NFKBIL1, CRB3, CPT1B, CHCHD10, FADS3, CCNE1, CASP10, MIR939, NUDT5, PFKP, CDCP1, IFT172, EPHA1, ICAM3, IL15, FAM83H, MREG, CAPG, DPP3, CENPI, LEXM, CHODL, IFIT2, MRPL54, CCL20, CIITA, FTH1P2, GSDMC, MAGEF1, ASF1B, CLUHP3, LYG2, ABHD11, PDIA4, MBOAT1, LINC00696, ARF5, MYB, CDK5RAP3, DDX58, ABCF3, LINC01270, KLK10, HSD3B7, FBP1, IL1PN, OBSCN, COX17, HLA-DOB, MACROD1, CYP2J2, LPAR3, CCL8, CLUH, CRYBB3, MMP9, BAIAP2L1, LYPD6B, ADAMDEC1, GCNT2, GPT, PDZK1IP1, KLHDC9, E2F1, C1orf210, CMPK2, HSD17B3, GPR141, B3GNT3, PI3,KLHL14, MYBPH, CHEK1, MUC16, HLA-G, LAGE3, FIS1, COMMD4, ADTRP, MGAT4B, GBA, FAM71E1, GADD45GIP1, NXNL2, NKG7, HSF1, MUC20, GCAT, TICRR, LLGL2, EXOSC4, IR200C, MVD, MCM2, PCK2, GMPR, PLSCR2, DOK7, CYP4B1, ELMO3, BBOX1, CLGN, CCDC124, CHPF2, NOD2, CYBC1, CBLC, ORC1, LRFN4, CKS1B, KIF2C, ATG16L2, GMNN, CXorf38, AMY2B, MCM5, KIFC1, DERL3, BATF2, PLEKHS1, BICDL2, FAM83E, MIR937, KLK7, MYO1G, GNG10, APOE, KIF20A, E2F8, KIF15, GZMA, NTHL1, LINC00636, PACSIN1, H2BU1, C8orf76, SLC52A3, ANP32AP1, MT1H, BIRC3, UBALD2, H2AW, PKHD1L1, CKAP2L, CCDC150, LIPH, IL1RL2, KLK8, ATP8B1, NCF1, CCDC88B, B3GALT4, HLA-H, DPM3, DOK5, LINC00173, ACY3, CEACAM6, MMP7, LAPTM5, ADAM8, CDC42BPG, FRMPD1, ACP3, ESR1, GALNT6, ACTL10, CXCL17, CD2, COLEC10, HSH2D, CD27, KCNK15, CDC45, RHEX, LMNTD2, HLA-DQA1, CD48, LILRB4, CD38, GZMB, GTSE1, PIGR, WASHC2A, ETV4, MPPED2, TESMIN, APOBEC3B, HOXD3, PCP2, CD320, AQP5, HDAC10, PKP3, CLCF1, GTF2H4, CATSPER1, PLCB2, AURKA, B3GAT3, DOK3, GOLT1A, C9orf163, CLECL1, KLK14, SYBU, MLPH, FCHO1, FAM83A, PLA2G3, NADSYN1, KRT23, MST1R, FAM234A, CKMT1B, CAPN13, HGD, KLRG2, ECHDC3, H3C14, CHST4, TSSC2, LGALS9B, NAPSB, GABRP, FUT3, HKDC1, ACY1, CACNA1E, TEDC2, DAPL1, HP, KIF12, LEMD1, GZMH, CYP4F11, FAM90A1, H1-1, DNHD1, MARCO, DMBT1, ACP5, PITX1, LILRA2, KIR3DL2, FCGR1A, HLA-DRB4, DAPK2, HLA-DQB2, NCF1C, GPR12, EPHX3, C9orf152, LRRC55, MMP10, APEH, NXF3, DUS3L, ELAPOR1, MGAT3, HLA-DRB5, HLA-DRB1, CHST6, LINC01101, C10orf99, KBTBD12, GCNT3, CCNA1, PGA5 |
| Downregulated | MSRB3, DACT3, DACT1, C1QTNF7, MMP16, LHFPL6, HEYL, PDGFRA, FLRT2, PDLIM3, CNRIP1, JAM3, C3orf70, COL5A1, MN1, APBB2, ADAMTSL2, CSDC2, PDPN, OLFML1, GPC6, DENND2A, LPAR4, IGDCC4, GFRA1, FILIP1L, CNTNAP1, NOVA1, CCND2, ELOVL4, PDGFD, EFEMP1, NR4A1, NUDT10, ABCA8, CDC42EP3, ECM2, CYYR1, ID3, OMD, ARHGAP28, FLNC, CD302, GASK1B, NDN, FZD1, OGN, CYGB, SSC5D, BNC2, OSR1, MIR100HG, GHR, FAM180A, CRISPLD2, PEAR1, CAV1, ANTXR2, MFAP4, C1QTNF1, BAMBI, GSTM3, DST, NUDT11, FEZ1, PDGFRB, PKIA, NLGN2, COL15A1, CILP, IGFBP5, KCNT2, PHACTR2, MYO1B, CALD1, ADGRA2, FBN1, DKK3, KIT, DLL1, GNG11, KLHL13, ADAMTS5, AKAP12, COL3A1, NR2F1, LMOD1, NPAS4, PLEKHH2, DIO3OS, COL6A3, NLGN4X, ADGRF5, ANTXR1, HTR2A, MXRA8, GNG2, CDO1, NID2, CACNA1C, PARD6G, CNN1, CHN2, GABBR1, MEDAG, COL5A2, LRCH2, GEM, LTBP4, IRAG1, GLI2, COL6A2, LRRC17, CLDN11, CALB2, EFHD1, CCDC80, HSPB7, NR4A3, CRISPLD1, CCN1, NDNF, CCDC102B, CAV2, P3H2, SMIM3, LSAMP, PLAC9, ADH1B, LRP4, ITGA8, FOXP2, GAP43, HEPH, EGR3, COX7A1, GLT8D2, PWWP3B, IRS1, CXCL12, MEOX2, LAMA4, NR2F2, ASPN, FBLN2, HAND2-AS1, ID1, BASP1, IGF1, CDH11, CALY, FBN2, PDZRN3, MYADM, CD300LG, MYH11, TENM3, ALDH1A3, FOSB, MYL3, KLF10, MRAS, ANKRD13B, MTSS1, LDB2, PLS3, CREB3L1, FHL5, ABCA6, COL16A1, CASC15, ATP8B2, OSR2, ANXA6, INMT, ADRA2A, CCDC178, MIR370, CAMK2N1, CLDN5 |

**Table S2.** The Venn analysis result of DEGs1, DEGs2 and IRGs

| **Names** | **Total** | **Elements** |
| --- | --- | --- |
| DEGs1, DEGs2 and IRGs | 65 | MMP16, NR2F2, IFIH1, FOSB, MRAS, IDO1, HTR3A, ALDH3B2, CSF1, BMP4, FOS, HOXC6, OAS1, LAMA2, EYA2, GPC3, BICC1, DLX5, NKD1, DSC3, IL6R, CDH5, NFKBIL1, CHRD, MIR939, IL15, CDH2, NOG, MEG3, HAS1, MAGEF1, ASF1B, GLI1, LPAR3, GPT, GRP, MIR212, KCNB1, BMP2, CYP4B1, CLGN, NCAM1, PHLPP2, GATA2, KLK7, NTHL1, GJA4, EEF1A2, LINC00173, CEACAM6, CDC42BPG, CSMD2, ESR1, CXCL17, COL4A4, PIGR, HOXC9, BHMT, ALDH3A1, MLPH, HOXC10, LAMA1, DLK1, NOS1, LINC01101 |
| **DEG1** | **1038** |  |
| **DEG2** | **696** |  |
| **IRGs** | **9163** |  |

**Table S3. GO analysis of the 287 genes associated with OC**

| **Category** | **ID** | **Term** | **Count** | ***P* value** |
| --- | --- | --- | --- | --- |
| BP | GO:0003002 | regionalization | 11 | 1.93E-08 |
| BP | GO:0007389 | pattern specification process | 12 | 2.43E-08 |
| BP | GO:0009952 | anterior/posterior pattern specification | 9 | 3.86E-08 |
| BP | GO:0021983 | pituitary gland development | 5 | 2.52E-07 |
| BP | GO:0030900 | forebrain development | 10 | 5.37E-07 |
| BP | GO:0072111 | cell proliferation involved in kidney development | 4 | 6.07E-07 |
| BP | GO:0030509 | BMP signaling pathway | 7 | 7.43E-07 |
| BP | GO:0048754 | branching morphogenesis of an epithelial tube | 7 | 7.43E-07 |
| BP | GO:0001503 | ossification | 10 | 8.64E-07 |
| BP | GO:0001655 | urogenital system development | 9 | 1.23E-06 |
| BP | GO:0071772 | response to BMP | 7 | 1.28E-06 |
| BP | GO:0071773 | cellular response to BMP stimulus | 7 | 1.28E-06 |
| BP | GO:2000027 | regulation of animal organ morphogenesis | 8 | 1.75E-06 |
| BP | GO:0090090 | negative regulation of canonical Wnt signaling pathway | 7 | 2.34E-06 |
| BP | GO:0007178 | transmembrane receptor protein serine/threonine kinase signaling pathway | 9 | 2.47E-06 |
| BP | GO:0061138 | morphogenesis of a branching epithelium | 7 | 2.61E-06 |
| BP | GO:0022612 | gland morphogenesis | 6 | 3.25E-06 |
| BP | GO:0035270 | endocrine system development | 6 | 3.40E-06 |
| BP | GO:0030111 | regulation of Wnt signaling pathway | 9 | 3.52E-06 |
| BP | GO:0001763 | morphogenesis of a branching structure | 7 | 4.20E-06 |
| BP | GO:0021536 | diencephalon development | 5 | 4.40E-06 |
| BP | GO:0045667 | regulation of osteoblast differentiation | 6 | 4.47E-06 |
| BP | GO:0060828 | regulation of canonical Wnt signaling pathway | 8 | 5.28E-06 |
| BP | GO:0030278 | regulation of ossification | 7 | 5.97E-06 |
| BP | GO:0030178 | negative regulation of Wnt signaling pathway | 7 | 7.38E-06 |
| BP | GO:0072006 | nephron development | 6 | 7.40E-06 |
| BP | GO:0001649 | osteoblast differentiation | 7 | 1.05E-05 |
| BP | GO:0010463 | mesenchymal cell proliferation | 4 | 1.30E-05 |
| BP | GO:0030510 | regulation of BMP signaling pathway | 5 | 1.35E-05 |
| BP | GO:0060070 | canonical Wnt signaling pathway | 8 | 1.45E-05 |
| BP | GO:0090192 | regulation of glomerulus development | 3 | 1.50E-05 |
| BP | GO:0050673 | epithelial cell proliferation | 9 | 1.61E-05 |
| BP | GO:0030225 | macrophage differentiation | 4 | 1.70E-05 |
| BP | GO:0042487 | regulation of odontogenesis of dentin-containing tooth | 3 | 1.84E-05 |
| BP | GO:0030850 | prostate gland development | 4 | 2.01E-05 |
| BP | GO:1902893 | regulation of pri-miRNA transcription by RNA polymerase II | 4 | 2.35E-05 |
| BP | GO:0061614 | pri-miRNA transcription by RNA polymerase II | 4 | 2.74E-05 |
| BP | GO:0048736 | appendage development | 6 | 2.83E-05 |
| BP | GO:0060173 | limb development | 6 | 2.83E-05 |
| BP | GO:0001658 | branching involved in ureteric bud morphogenesis | 4 | 4.20E-05 |
| BP | GO:0050678 | regulation of epithelial cell proliferation | 8 | 4.33E-05 |
| BP | GO:0007517 | muscle organ development | 8 | 5.35E-05 |
| BP | GO:0060541 | respiratory system development | 6 | 5.52E-05 |
| BP | GO:0032835 | glomerulus development | 4 | 5.80E-05 |
| BP | GO:0048562 | embryonic organ morphogenesis | 7 | 5.82E-05 |
| BP | GO:0030326 | embryonic limb morphogenesis | 5 | 6.08E-05 |
| BP | GO:0035113 | embryonic appendage morphogenesis | 5 | 6.08E-05 |
| BP | GO:0060675 | ureteric bud morphogenesis | 4 | 6.16E-05 |
| BP | GO:0002573 | myeloid leukocyte differentiation | 6 | 6.48E-05 |
| BP | GO:0072171 | mesonephric tubule morphogenesis | 4 | 6.54E-05 |
| BP | GO:0048706 | embryonic skeletal system development | 5 | 6.79E-05 |
| BP | GO:0045995 | regulation of embryonic development | 5 | 7.84E-05 |
| BP | GO:0060740 | prostate gland epithelium morphogenesis | 3 | 8.33E-05 |
| BP | GO:0042481 | regulation of odontogenesis | 3 | 9.35E-05 |
| BP | GO:0048732 | gland development | 8 | 9.66E-05 |
| BP | GO:0072078 | nephron tubule morphogenesis | 4 | 9.71E-05 |
| BP | GO:0060562 | epithelial tube morphogenesis | 7 | 0.0001032 |
| BP | GO:0060512 | prostate gland morphogenesis | 3 | 0.0001044 |
| BP | GO:0001707 | mesoderm formation | 4 | 0.0001079 |
| BP | GO:0072088 | nephron epithelium morphogenesis | 4 | 0.0001079 |
| BP | GO:0048568 | embryonic organ development | 8 | 0.0001093 |
| BP | GO:0001958 | endochondral ossification | 3 | 0.0001162 |
| BP | GO:0036075 | replacement ossification | 3 | 0.0001162 |
| BP | GO:0048332 | mesoderm morphogenesis | 4 | 0.0001196 |
| BP | GO:0061333 | renal tubule morphogenesis | 4 | 0.0001196 |
| BP | GO:0072028 | nephron morphogenesis | 4 | 0.0001196 |
| BP | GO:0003401 | axis elongation | 3 | 0.0001288 |
| BP | GO:0035107 | appendage morphogenesis | 5 | 0.0001335 |
| BP | GO:0035108 | limb morphogenesis | 5 | 0.0001335 |
| BP | GO:0001667 | ameboidal-type cell migration | 8 | 0.0001702 |
| BP | GO:0009954 | proximal/distal pattern formation | 3 | 0.0001719 |
| BP | GO:0061311 | cell surface receptor signaling pathway involved in heart development | 3 | 0.0001719 |
| BP | GO:0110110 | positive regulation of animal organ morphogenesis | 4 | 0.0001754 |
| BP | GO:0090092 | regulation of transmembrane receptor protein serine/threonine kinase signaling pathway | 6 | 0.0001837 |
| BP | GO:0030513 | positive regulation of BMP signaling pathway | 3 | 0.0002052 |
| BP | GO:0009953 | dorsal/ventral pattern formation | 4 | 0.000238 |
| BP | GO:0072080 | nephron tubule development | 4 | 0.0002481 |
| BP | GO:0060993 | kidney morphogenesis | 4 | 0.0002584 |
| BP | GO:0061326 | renal tubule development | 4 | 0.0002691 |
| BP | GO:0014706 | striated muscle tissue development | 7 | 0.0002782 |
| BP | GO:0030324 | lung development | 5 | 0.0002884 |
| BP | GO:0048704 | embryonic skeletal system morphogenesis | 4 | 0.0002915 |
| BP | GO:0045165 | cell fate commitment | 6 | 0.0002986 |
| BP | GO:0001657 | ureteric bud development | 4 | 0.0003032 |
| BP | GO:0090184 | positive regulation of kidney development | 3 | 0.0003062 |
| BP | GO:1902895 | positive regulation of pri-miRNA transcription by RNA polymerase II | 3 | 0.0003062 |
| BP | GO:0072163 | mesonephric epithelium development | 4 | 0.0003151 |
| BP | GO:0072164 | mesonephric tubule development | 4 | 0.0003151 |
| BP | GO:0030323 | respiratory tube development | 5 | 0.0003197 |
| BP | GO:1905330 | regulation of morphogenesis of an epithelium | 5 | 0.0003197 |
| BP | GO:0001822 | kidney development | 6 | 0.0003284 |
| BP | GO:2000826 | regulation of heart morphogenesis | 3 | 0.0003296 |
| BP | GO:0043542 | endothelial cell migration | 6 | 0.0003474 |
| BP | GO:0055024 | regulation of cardiac muscle tissue development | 4 | 0.0003532 |
| BP | GO:0001823 | mesonephros development | 4 | 0.0003665 |
| BP | GO:0060537 | muscle tissue development | 7 | 0.0003765 |
| BP | GO:0072001 | renal system development | 6 | 0.0003879 |
| BP | GO:0007369 | gastrulation | 5 | 0.0003899 |
| BP | GO:0003197 | endocardial cushion development | 3 | 0.0004347 |
| BP | GO:0060443 | mammary gland morphogenesis | 3 | 0.0004347 |
| BP | GO:0021510 | spinal cord development | 4 | 0.0004545 |
| BP | GO:0007565 | female pregnancy | 5 | 0.0004604 |
| BP | GO:0003129 | heart induction | 2 | 0.0004701 |
| BP | GO:0003149 | membranous septum morphogenesis | 2 | 0.0004701 |
| BP | GO:0048570 | notochord morphogenesis | 2 | 0.0004701 |
| BP | GO:0060513 | prostatic bud formation | 2 | 0.0004701 |
| BP | GO:0072124 | regulation of glomerular mesangial cell proliferation | 2 | 0.0004701 |
| BP | GO:0072009 | nephron epithelium development | 4 | 0.0004705 |
| BP | GO:0090100 | positive regulation of transmembrane receptor protein serine/threonine kinase signaling pathway | 4 | 0.0004705 |
| BP | GO:0010171 | body morphogenesis | 3 | 0.0005591 |
| BP | GO:0042482 | positive regulation of odontogenesis | 2 | 0.0005734 |
| BP | GO:0060272 | embryonic skeletal joint morphogenesis | 2 | 0.0005734 |
| BP | GO:0072110 | glomerular mesangial cell proliferation | 2 | 0.0005734 |
| BP | GO:0090193 | positive regulation of glomerulus development | 2 | 0.0005734 |
| BP | GO:0050679 | positive regulation of epithelial cell proliferation | 5 | 0.0006436 |
| BP | GO:0060425 | lung morphogenesis | 3 | 0.000666 |
| BP | GO:0060442 | branching involved in prostate gland morphogenesis | 2 | 0.0006866 |
| BP | GO:0072178 | nephric duct morphogenesis | 2 | 0.0006866 |
| BP | GO:0060350 | endochondral bone morphogenesis | 3 | 0.0007851 |
| BP | GO:0001704 | formation of primary germ layer | 4 | 0.0008079 |
| BP | GO:0021978 | telencephalon regionalization | 2 | 0.0008097 |
| BP | GO:0060601 | lateral sprouting from an epithelium | 2 | 0.0008097 |
| BP | GO:2000052 | positive regulation of non-canonical Wnt signaling pathway | 2 | 0.0008097 |
| BP | GO:0060688 | regulation of morphogenesis of a branching structure | 3 | 0.0008276 |
| BP | GO:0090183 | regulation of kidney development | 3 | 0.0008276 |
| BP | GO:0014013 | regulation of gliogenesis | 4 | 0.0008319 |
| BP | GO:0043583 | ear development | 5 | 0.0008423 |
| BP | GO:0044706 | multi-multicellular organism process | 5 | 0.0008766 |
| BP | GO:0048705 | skeletal system morphogenesis | 5 | 0.0009118 |
| BP | GO:1901722 | regulation of cell proliferation involved in kidney development | 2 | 0.0009427 |
| BP | GO:0007498 | mesoderm development | 4 | 0.0009868 |
| BP | GO:0007409 | axonogenesis | 7 | 0.0009941 |
| BP | GO:0003158 | endothelium development | 4 | 0.0010145 |
| BP | GO:0048638 | regulation of developmental growth | 6 | 0.0010465 |
| BP | GO:0045843 | negative regulation of striated muscle tissue development | 3 | 0.001062 |
| BP | GO:0060560 | developmental growth involved in morphogenesis | 5 | 0.0010636 |
| BP | GO:0072498 | embryonic skeletal joint development | 2 | 0.0010854 |
| BP | GO:2000095 | regulation of Wnt signaling pathway, planar cell polarity pathway | 2 | 0.0010854 |
| BP | GO:0010594 | regulation of endothelial cell migration | 5 | 0.0011043 |
| BP | GO:0048635 | negative regulation of muscle organ development | 3 | 0.0011134 |
| BP | GO:0060393 | regulation of pathway-restricted SMAD protein phosphorylation | 3 | 0.0011134 |
| BP | GO:1901862 | negative regulation of muscle tissue development | 3 | 0.0012208 |
| BP | GO:0072073 | kidney epithelium development | 4 | 0.0012235 |
| BP | GO:0033002 | muscle cell proliferation | 5 | 0.0012333 |
| BP | GO:0017014 | protein nitrosylation | 2 | 0.0012379 |
| BP | GO:0018119 | peptidyl-cysteine S-nitrosylation | 2 | 0.0012379 |
| BP | GO:0060572 | morphogenesis of an epithelial bud | 2 | 0.0012379 |
| BP | GO:0072109 | glomerular mesangium development | 2 | 0.0012379 |
| BP | GO:0072176 | nephric duct development | 2 | 0.0012379 |
| BP | GO:0010631 | epithelial cell migration | 6 | 0.0012424 |
| BP | GO:0048645 | animal organ formation | 3 | 0.0012769 |
| BP | GO:0060389 | pathway-restricted SMAD protein phosphorylation | 3 | 0.0012769 |
| BP | GO:0090132 | epithelium migration | 6 | 0.0012955 |
| BP | GO:0045669 | positive regulation of osteoblast differentiation | 3 | 0.0013346 |
| BP | GO:0048663 | neuron fate commitment | 3 | 0.0013939 |
| BP | GO:0003128 | heart field specification | 2 | 0.0014 |
| BP | GO:0097094 | craniofacial suture morphogenesis | 2 | 0.0014 |
| BP | GO:1905331 | negative regulation of morphogenesis of an epithelium | 2 | 0.0014 |
| BP | GO:0090130 | tissue migration | 6 | 0.0014069 |
| BP | GO:0045926 | negative regulation of growth | 5 | 0.0014728 |
| BP | GO:0001710 | mesodermal cell fate commitment | 2 | 0.0015716 |
| BP | GO:0001701 | in utero embryonic development | 6 | 0.0015875 |
| BP | GO:0021537 | telencephalon development | 5 | 0.0016046 |
| BP | GO:0016202 | regulation of striated muscle tissue development | 4 | 0.0016102 |
| BP | GO:0001894 | tissue homeostasis | 5 | 0.0016597 |
| BP | GO:0061448 | connective tissue development | 5 | 0.0016878 |
| BP | GO:0061035 | regulation of cartilage development | 3 | 0.0017153 |
| BP | GO:1901861 | regulation of muscle tissue development | 4 | 0.0017289 |
| BP | GO:0010759 | positive regulation of macrophage chemotaxis | 2 | 0.0017528 |
| BP | GO:0060602 | branch elongation of an epithelium | 2 | 0.0017528 |
| BP | GO:0070233 | negative regulation of T cell apoptotic process | 2 | 0.0017528 |
| BP | GO:0048634 | regulation of muscle organ development | 4 | 0.0017698 |
| BP | GO:0030198 | extracellular matrix organization | 6 | 0.0018553 |
| BP | GO:0043062 | extracellular structure organization | 6 | 0.0018791 |
| BP | GO:0090596 | sensory organ morphogenesis | 5 | 0.0018941 |
| BP | GO:0030903 | notochord development | 2 | 0.0019435 |
| BP | GO:0051412 | response to corticosterone | 2 | 0.0019435 |
| BP | GO:0033555 | multicellular organismal response to stress | 3 | 0.0020031 |
| BP | GO:0042402 | cellular biogenic amine catabolic process | 2 | 0.0021435 |
| BP | GO:0098742 | cell-cell adhesion via plasma-membrane adhesion molecules | 5 | 0.002152 |
| BP | GO:0060395 | SMAD protein signal transduction | 3 | 0.0021577 |
| BP | GO:0007156 | homophilic cell adhesion via plasma membrane adhesion molecules | 4 | 0.0022648 |
| BP | GO:0021533 | cell differentiation in hindbrain | 2 | 0.0023529 |
| BP | GO:0090189 | regulation of branching involved in ureteric bud morphogenesis | 2 | 0.0023529 |
| BP | GO:0007411 | axon guidance | 5 | 0.0023979 |
| BP | GO:0097485 | neuron projection guidance | 5 | 0.0024346 |
| BP | GO:0009310 | amine catabolic process | 2 | 0.0025715 |
| BP | GO:0045649 | regulation of macrophage differentiation | 2 | 0.0025715 |
| BP | GO:1901522 | positive regulation of transcription from RNA polymerase II promoter involved in cellular response to chemical stimulus | 2 | 0.0025715 |
| BP | GO:1903798 | regulation of production of miRNAs involved in gene silencing by miRNA | 2 | 0.0025715 |
| BP | GO:2000050 | regulation of non-canonical Wnt signaling pathway | 2 | 0.0025715 |
| BP | GO:1902105 | regulation of leukocyte differentiation | 5 | 0.0026244 |
| BP | GO:0001759 | organ induction | 2 | 0.0027994 |
| BP | GO:0021871 | forebrain regionalization | 2 | 0.0027994 |
| BP | GO:0042738 | exogenous drug catabolic process | 2 | 0.0027994 |
| BP | GO:0060444 | branching involved in mammary gland duct morphogenesis | 2 | 0.0027994 |
| BP | GO:0030099 | myeloid cell differentiation | 6 | 0.0028674 |
| BP | GO:0042537 | benzene-containing compound metabolic process | 2 | 0.0030364 |
| BP | GO:0060571 | morphogenesis of an epithelial fold | 2 | 0.0030364 |
| BP | GO:0061217 | regulation of mesonephros development | 2 | 0.0030364 |
| BP | GO:0070920 | regulation of production of small RNA involved in gene silencing by RNA | 2 | 0.0030364 |
| BP | GO:0010632 | regulation of epithelial cell migration | 5 | 0.0030797 |
| BP | GO:0030177 | positive regulation of Wnt signaling pathway | 4 | 0.0030833 |
| BP | GO:0001936 | regulation of endothelial cell proliferation | 4 | 0.0031441 |
| BP | GO:0042737 | drug catabolic process | 2 | 0.0032825 |
| BP | GO:0060037 | pharyngeal system development | 2 | 0.0032825 |
| BP | GO:0072012 | glomerulus vasculature development | 2 | 0.0032825 |
| BP | GO:1905523 | positive regulation of macrophage migration | 2 | 0.0032825 |
| BP | GO:0048608 | reproductive structure development | 6 | 0.0032829 |
| BP | GO:1901342 | regulation of vasculature development | 6 | 0.0033195 |
| BP | GO:0042475 | odontogenesis of dentin-containing tooth | 3 | 0.0033429 |
| BP | GO:2000177 | regulation of neural precursor cell proliferation | 3 | 0.0033429 |
| BP | GO:0042063 | gliogenesis | 5 | 0.0033508 |
| BP | GO:0061458 | reproductive system development | 6 | 0.003431 |
| BP | GO:0043534 | blood vessel endothelial cell migration | 4 | 0.0034607 |
| BP | GO:0090287 | regulation of cellular response to growth factor stimulus | 5 | 0.0034926 |
| BP | GO:0045603 | positive regulation of endothelial cell differentiation | 2 | 0.0035376 |
| BP | GO:0045672 | positive regulation of osteoclast differentiation | 2 | 0.0035376 |
| BP | GO:0045778 | positive regulation of ossification | 3 | 0.0036629 |
| BP | GO:0051591 | response to cAMP | 3 | 0.0036629 |
| BP | GO:0060349 | bone morphogenesis | 3 | 0.0036629 |
| BP | GO:0044331 | cell-cell adhesion mediated by cadherin | 2 | 0.0038017 |
| BP | GO:0045745 | positive regulation of G protein-coupled receptor signaling pathway | 2 | 0.0038017 |
| BP | GO:0061437 | renal system vasculature development | 2 | 0.0038017 |
| BP | GO:0061440 | kidney vasculature development | 2 | 0.0038017 |
| BP | GO:0007219 | Notch signaling pathway | 4 | 0.0038686 |
| BP | GO:0002690 | positive regulation of leukocyte chemotaxis | 3 | 0.0038862 |
| BP | GO:0071674 | mononuclear cell migration | 3 | 0.004001 |
| BP | GO:0048839 | inner ear development | 4 | 0.0040115 |
| BP | GO:0035116 | embryonic hindlimb morphogenesis | 2 | 0.0040747 |
| BP | GO:0048873 | homeostasis of number of cells within a tissue | 2 | 0.0040747 |
| BP | GO:0060441 | epithelial tube branching involved in lung morphogenesis | 2 | 0.0040747 |
| BP | GO:0030316 | osteoclast differentiation | 3 | 0.0041177 |
| BP | GO:0001935 | endothelial cell proliferation | 4 | 0.0041579 |
| BP | GO:0010717 | regulation of epithelial to mesenchymal transition | 3 | 0.0042366 |
| BP | GO:0010758 | regulation of macrophage chemotaxis | 2 | 0.0043565 |
| BP | GO:1901605 | alpha-amino acid metabolic process | 4 | 0.0043843 |
| BP | GO:0045639 | positive regulation of myeloid cell differentiation | 3 | 0.0044804 |
| BP | GO:0060348 | bone development | 4 | 0.0045397 |
| BP | GO:1903708 | positive regulation of hemopoiesis | 4 | 0.0045397 |
| BP | GO:0032147 | activation of protein kinase activity | 5 | 0.0046093 |
| BP | GO:0048710 | regulation of astrocyte differentiation | 2 | 0.0046472 |
| BP | GO:0060325 | face morphogenesis | 2 | 0.0046472 |
| BP | GO:0060914 | heart formation | 2 | 0.0046472 |
| BP | GO:0061037 | negative regulation of cartilage development | 2 | 0.0046472 |
| BP | GO:0070229 | negative regulation of lymphocyte apoptotic process | 2 | 0.0046472 |
| BP | GO:0007200 | phospholipase C-activating G protein-coupled receptor signaling pathway | 3 | 0.004862 |
| BP | GO:1901606 | alpha-amino acid catabolic process | 3 | 0.004862 |
| BP | GO:0051385 | response to mineralocorticoid | 2 | 0.0049465 |
| BP | GO:0060317 | cardiac epithelial to mesenchymal transition | 2 | 0.0049465 |
| BP | GO:0060603 | mammary gland duct morphogenesis | 2 | 0.0049465 |
| BP | GO:0061036 | positive regulation of cartilage development | 2 | 0.0049465 |
| BP | GO:0010464 | regulation of mesenchymal cell proliferation | 2 | 0.0052546 |
| BP | GO:0008593 | regulation of Notch signaling pathway | 3 | 0.0054004 |
| BP | GO:0048545 | response to steroid hormone | 5 | 0.005549 |
| BP | GO:0035633 | maintenance of blood-brain barrier | 2 | 0.0055712 |
| BP | GO:0060795 | cell fate commitment involved in formation of primary germ layer | 2 | 0.0055712 |
| BP | GO:0070232 | regulation of T cell apoptotic process | 2 | 0.0055712 |
| BP | GO:2000352 | negative regulation of endothelial cell apoptotic process | 2 | 0.0055712 |
| BP | GO:0030336 | negative regulation of cell migration | 5 | 0.0058209 |
| BP | GO:0003203 | endocardial cushion morphogenesis | 2 | 0.0058965 |
| BP | GO:0048333 | mesodermal cell differentiation | 2 | 0.0058965 |
| BP | GO:0110111 | negative regulation of animal organ morphogenesis | 2 | 0.0058965 |
| BP | GO:0032944 | regulation of mononuclear cell proliferation | 4 | 0.0060136 |
| BP | GO:0001938 | positive regulation of endothelial cell proliferation | 3 | 0.006122 |
| BP | GO:0010092 | specification of animal organ identity | 2 | 0.0062302 |
| BP | GO:0031128 | developmental induction | 2 | 0.0062302 |
| BP | GO:0060323 | head morphogenesis | 2 | 0.0062302 |
| BP | GO:1905332 | positive regulation of morphogenesis of an epithelium | 2 | 0.0062302 |
| BP | GO:0048640 | negative regulation of developmental growth | 3 | 0.0064261 |
| BP | GO:0030212 | hyaluronan metabolic process | 2 | 0.0065723 |
| BP | GO:0035137 | hindlimb morphogenesis | 2 | 0.0065723 |
| BP | GO:0030282 | bone mineralization | 3 | 0.006739 |
| BP | GO:0045446 | endothelial cell differentiation | 3 | 0.006739 |
| BP | GO:0010001 | glial cell differentiation | 4 | 0.0069097 |
| BP | GO:0003156 | regulation of animal organ formation | 2 | 0.0069229 |
| BP | GO:0030224 | monocyte differentiation | 2 | 0.0069229 |
| BP | GO:0045880 | positive regulation of smoothened signaling pathway | 2 | 0.0069229 |
| BP | GO:1903131 | mononuclear cell differentiation | 2 | 0.0069229 |
| BP | GO:2000146 | negative regulation of cell motility | 5 | 0.0069249 |
| MF | GO:0070700 | BMP receptor binding | 3 | 9.76E-06 |
| MF | GO:0070696 | transmembrane receptor protein serine/threonine kinase binding | 3 | 6.73E-05 |
| MF | GO:0033612 | receptor serine/threonine kinase binding | 3 | 0.00012 |
| MF | GO:0045295 | gamma-catenin binding | 2 | 0.0007021 |
| MF | GO:0039706 | co-receptor binding | 2 | 0.0008279 |
| MF | GO:0004029 | aldehyde dehydrogenase (NAD+) activity | 2 | 0.0011098 |
| MF | GO:0004030 | aldehyde dehydrogenase [NAD(P)+] activity | 2 | 0.0012656 |
